# Supplementary material for: SARS-CoV-2 strategically mimics proteolytic activation of human ENaC
Source: eLife journal article supplement (doi:10.7554/elife.58603), 2020-05-26
Supplement: supp [file elife-58603-supp-v1.zip]

Archive with 8 entries (8 files):
- elife_poa_e58603_Supplementary_file_1.docx
- elife_poa_e58603_Transparent_Reporting_File.pdf
- elife_poa_e58603_Figure_2_figure_supplement_1.pdf
- elife_poa_e58603_Figure_2_figure_supplement_2.pdf
- elife_poa_e58603_Figure_2_figure_supplement_3.pdf
- elife_poa_e58603_Figure_2_figure_supplement_4.pdf
- elife_poa_e58603_Figure_2_figure_supplement_5.pdf
- elife_poa_e58603_Figure_2_figure_supplement_6.pdf
