# Supplementary material for: SARS-CoV-2 strategically mimics proteolytic activation of human ENaC
Source: eLife journal article supplement (doi:10.7554/elife.58603), 2020-05-26
Supplement: supp [file elife-58603-supp-v1.zip › elife_poa_e58603_Figure_2_figure_supplement_1.pdf]

## Expression in cardiomyocytes

ENAC- $\alpha$

| Tissue | Signals Strength to Tissue | Cell                                                                                             | Signals Strength to Cell | Expression in Individual Cells (Counts Per 10K) 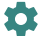 | Number of Cells | Percent of cells with expression > 0 |
|--------|----------------------------|--------------------------------------------------------------------------------------------------|--------------------------|-------------------------------------------------------------------------------------------------------------------------------------|-----------------|--------------------------------------|
| heart  |                            | Cardiomyocytes 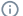 |                          | 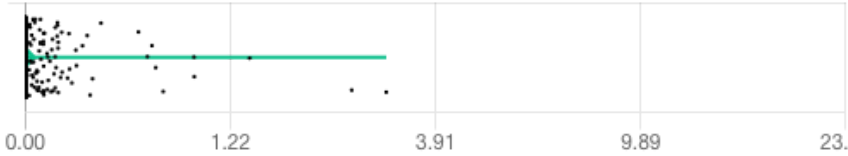                                                 | 7670            | 1.17                                 |

ACE2

| Tissue | Signals Strength to Tissue | Cell                                                                                             | Signals Strength to Cell | Expression in Individual Cells (Counts Per 10K) 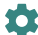 | Number of Cells | Percent of cells with expression > 0 |
|--------|----------------------------|--------------------------------------------------------------------------------------------------|--------------------------|-------------------------------------------------------------------------------------------------------------------------------------|-----------------|--------------------------------------|
| heart  |                            | Cardiomyocytes 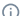 |                          | 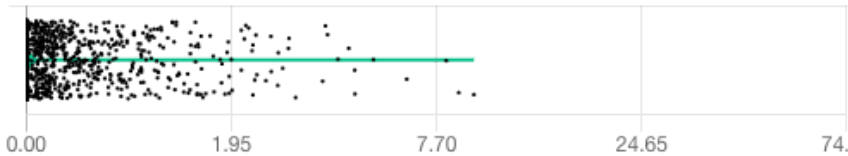                                                | 7670            | 7.97                                 |
