# Supplementary material for: SARS-CoV-2 strategically mimics proteolytic activation of human ENaC
Source: eLife journal article supplement (doi:10.7554/elife.58603), 2020-05-26
Supplement: supp [file elife-58603-supp-v1.zip › elife_poa_e58603_Figure_2_figure_supplement_4.pdf]

## Expression in tongue keratinocytes

ENAC- $\alpha$

| Tissue <sup>i</sup> | Signals Strength to Tissue <sup>i</sup> | Cell <sup>i</sup> | Signals Strength to Cell <sup>i</sup> | Expression: $\ln(1 + \text{CP10K})$                                                 | Number of Cells <sup>i</sup> | Percent of cells with expression > 0 <sup>i</sup> |
|---------------------|-----------------------------------------|-------------------|---------------------------------------|-------------------------------------------------------------------------------------|------------------------------|---------------------------------------------------|
| tongue              |                                         | keratinocytes     |                                       | 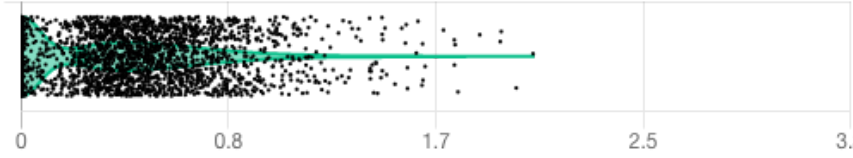 | 3406                         | 57.6                                              |

ACE2

| Tissue <sup>i</sup> | Signals Strength to Tissue <sup>i</sup> | Cell <sup>i</sup> | Signals Strength to Cell <sup>i</sup> | Expression: $\ln(1 + \text{CP10K})$                                                  | Number of Cells <sup>i</sup> | Percent of cells with expression > 0 <sup>i</sup> |
|---------------------|-----------------------------------------|-------------------|---------------------------------------|--------------------------------------------------------------------------------------|------------------------------|---------------------------------------------------|
| tongue              |                                         | keratinocytes     |                                       | 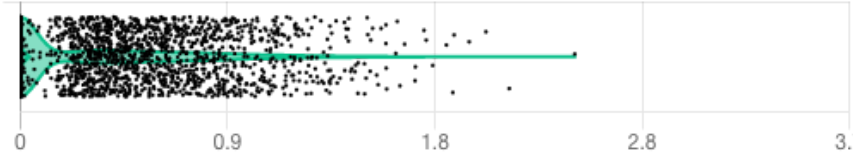 | 3406                         | 41.54                                             |
