# Supplementary material for: SARS-CoV-2 strategically mimics proteolytic activation of human ENaC
Source: eLife journal article supplement (doi:10.7554/elife.58603), 2020-05-26
Supplement: supp [file elife-58603-supp-v1.zip › elife_poa_e58603_Figure_2_figure_supplement_5.pdf]

ENAC-α

| <div><div><div><div><div><div></div><div>Tissue</div></div></div><div><div><div><div><div></div><div>Signals Strength to Tissue</div></div><div><div><div><div></div><div>Cell</div></div></div><div><div><div><div></div><div>Signals Strength to Cell</div></div></div></div></div><div><div><div><div><div></div><div>Expression: <math>\ln(1 + \text{CP10K})</math></div></div></div></div><div><div><div><div></div><div>Number of Cells</div></div><div><div><div><div></div><div>Percent of cells with expression &gt; 0</div></div></div></div></div></div></div></div></div></div></div></div></div> |  |                         |  |                                                                                    |       |       |
|---------------------------------------------------------------------------------------------------------------------------------------------------------------------------------------------------------------------------------------------------------------------------------------------------------------------------------------------------------------------------------------------------------------------------------------------------------------------------------------------------------------------------------------------------------------------------------------------------------------|--|-------------------------|--|------------------------------------------------------------------------------------|-------|-------|
| kidney                                                                                                                                                                                                                                                                                                                                                                                                                                                                                                                                                                                                        |  | Principal cells         |  | 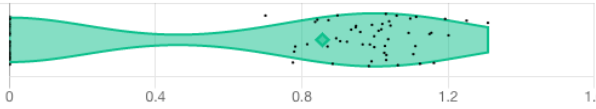 | 88    | 57.95 |
| kidney                                                                                                                                                                                                                                                                                                                                                                                                                                                                                                                                                                                                        |  | Connecting tubule cells |  | 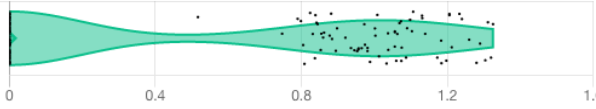 | 157   | 46.5  |
| kidney                                                                                                                                                                                                                                                                                                                                                                                                                                                                                                                                                                                                        |  | Proximal tubule cells   |  | 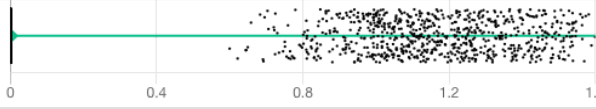 | 27497 | 2.77  |

ACE2

| <div><div><div><div><div><div></div><div>Tissue</div></div></div><div><div><div><div><div></div><div>Signals Strength to Tissue</div></div><div><div><div><div></div><div>Cell</div></div></div><div><div><div><div></div><div>Signals Strength to Cell</div></div></div></div></div><div><div><div><div><div></div><div>Expression: <math>\ln(1 + \text{CP10K})</math></div></div></div></div><div><div><div><div></div><div>Number of Cells</div></div><div><div><div><div></div><div>Percent of cells with expression &gt; 0</div></div></div></div></div></div></div></div></div></div></div></div></div> |  |                         |  |                                                                                      |       |      |
|---------------------------------------------------------------------------------------------------------------------------------------------------------------------------------------------------------------------------------------------------------------------------------------------------------------------------------------------------------------------------------------------------------------------------------------------------------------------------------------------------------------------------------------------------------------------------------------------------------------|--|-------------------------|--|--------------------------------------------------------------------------------------|-------|------|
| kidney                                                                                                                                                                                                                                                                                                                                                                                                                                                                                                                                                                                                        |  | Principal cells         |  | 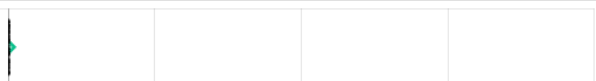   | 88    | 0    |
| kidney                                                                                                                                                                                                                                                                                                                                                                                                                                                                                                                                                                                                        |  | Connecting tubule cells |  | 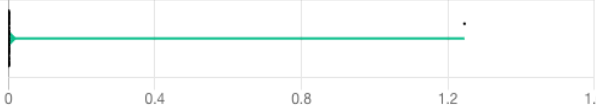 | 157   | 0.64 |
| kidney                                                                                                                                                                                                                                                                                                                                                                                                                                                                                                                                                                                                        |  | Proximal tubule cells   |  | 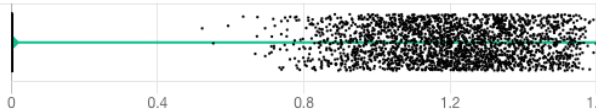 | 27497 | 8.46 |
