# Supplementary figures and images for: SARS-CoV-2 strategically mimics proteolytic activation of human ENaC
Source: eLife journal article supplement (doi:10.7554/elife.58603), 2020-05-26

# Expression in Type-II alveolar cells of lungs

ENAC- $\alpha$

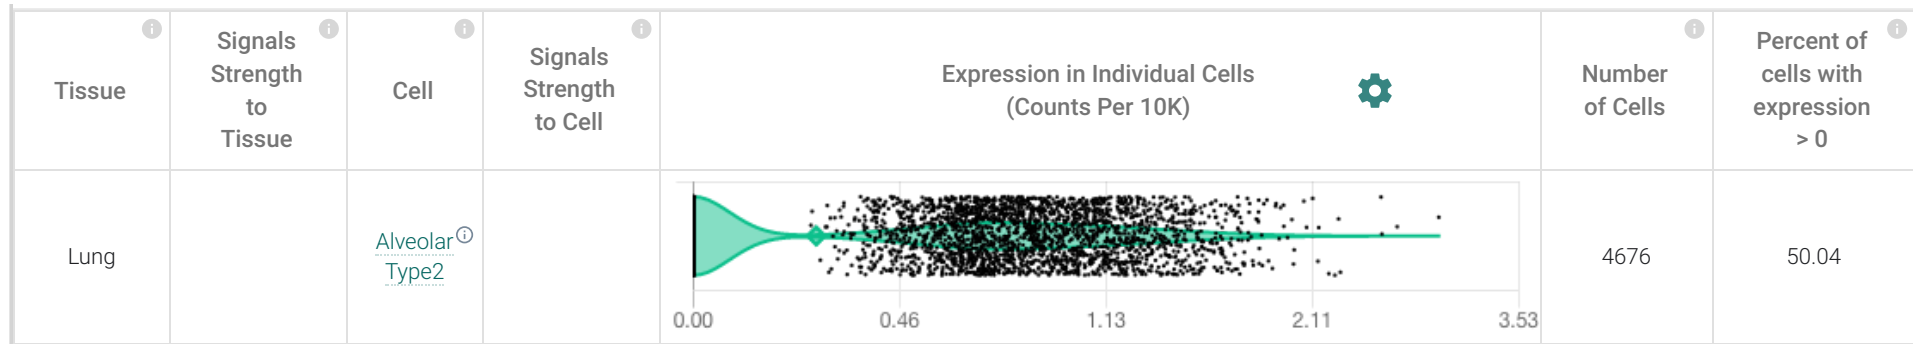

ACE2

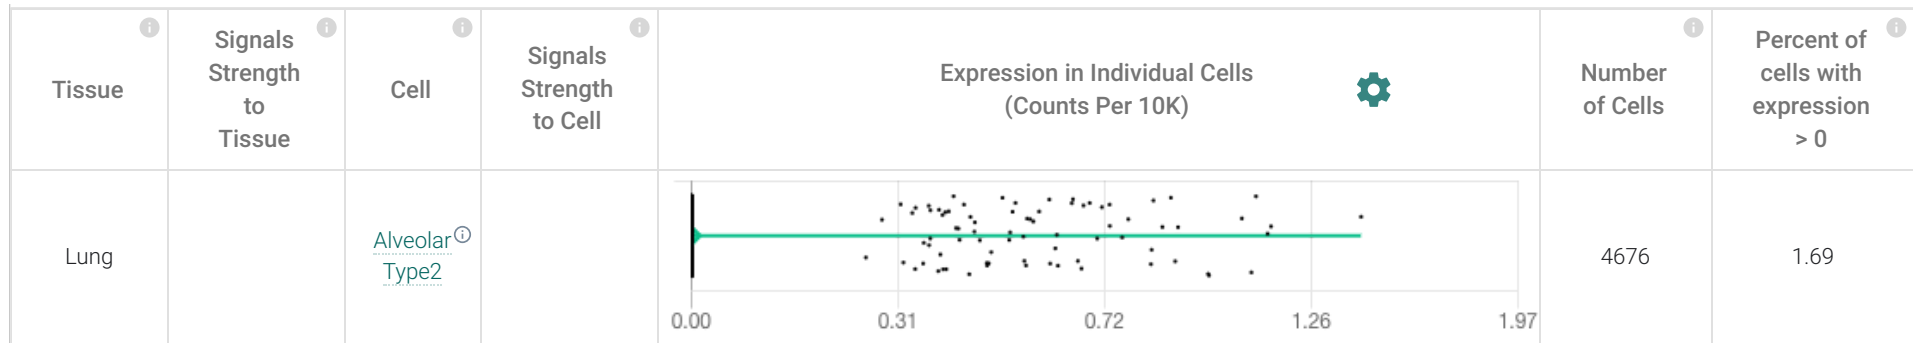

Supplement: supp [file elife-58603-supp-v1.zip › elife_poa_e58603_Figure_2_figure_supplement_2.pdf]

ENAC-α

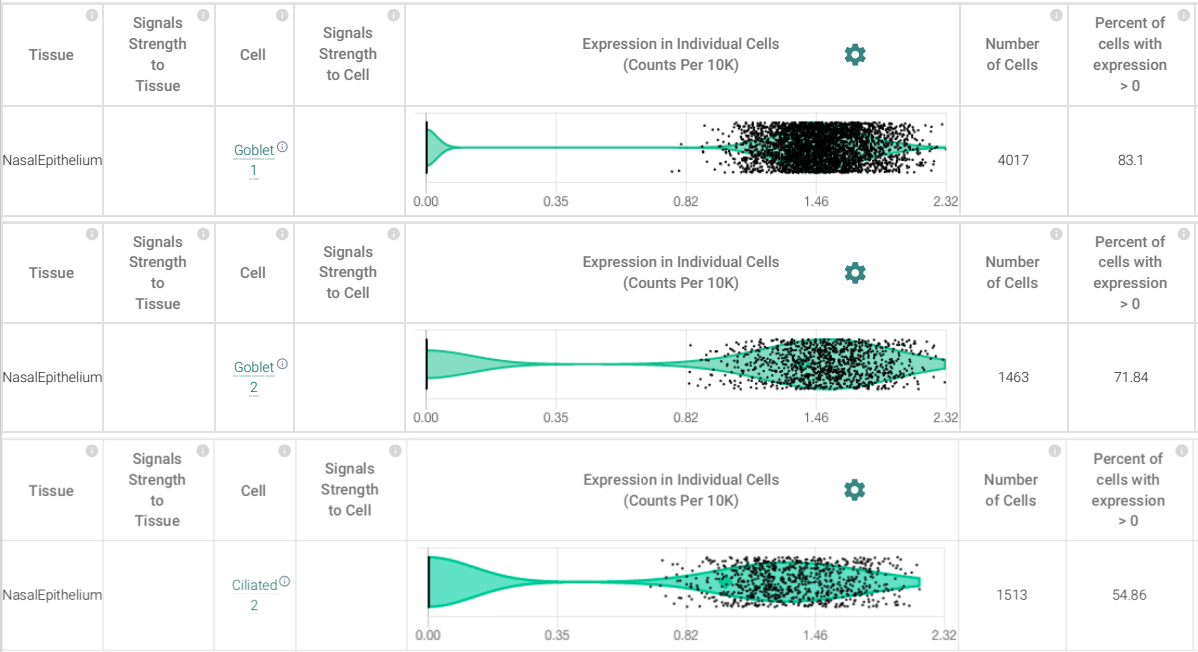

ACE2

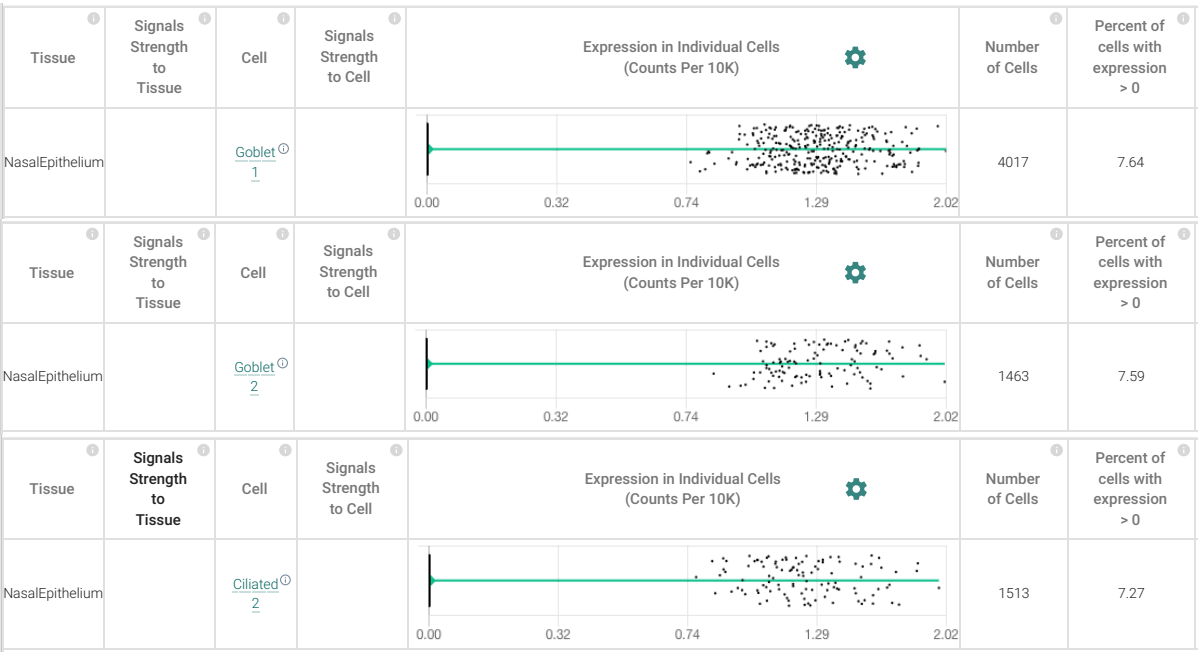

Supplement: supp [file elife-58603-supp-v1.zip › elife_poa_e58603_Figure_2_figure_supplement_3.pdf]
